# Supplementary material for: Deficiency of Interleukin-40 Prevents Intestinal Damage in Experimental Necrotizing Enterocolitis by Inhibiting NETosis
Source: Research Square preprint supplement (doi:10.21203/rs.3.rs-7615332/v1), 2025-10-03
Supplement: Supplementary file 1 [file d906b6dc5342c8e8009640cf.docx]

1. NEC plasma shows markedly elevated IL-40, massive intestinal neutrophil infiltration and abundant NET formation.

2. Neutrophils derived from NEC secrete bioactive IL-40, an indispensable driver of NETosis that amplifies inflammation and intestinal damage.

3. IL-40 drives neutrophil inflammation via mitochondrial ROS, identifying it as a key mediator of NEC-related intestinal injury.
